# Supplementary material
Source: Research Square preprint supplement (doi:10.21203/rs.3.rs-9278536/v1)
Supplement: Supplementary file 1 [file 136f86a740485b640778ad17.docx]

**Table S1**. An overview of the plasmids and engineering strains utilized in this research

| Strains or plasmids | Description | Resource |
| --- | --- | --- |
| Strains |  |  |
| E. coli JM109 | recA1, endA1, thi, gyrA96, supE44, hsdR17Δ(lac-proAB)/F’ [traD36, proAB+, lacIq, lacZΔM15] | Lab stock |
| E. coli BL21 (DE3) | F- ompT hsdSB (rB-mB-) gal dcm rne131λ (DE3) | Lab stock |
| BE0 | *E. coli* BL21 (DE3) Δ*lacZ* Δ*lacA* Δ*wcaJ* Δ*pfkA* Δ*poxB* Δ*nudD* | Lab stock |
| BE1 | *E. coli* BL21 (DE3) *ΔlacZ ΔlacA ΔwcaJ ΔpfkA ΔpoxB ΔnudD pETDuet-*BKHT*,* pRSFDuet *-GalTpm1141* | this study |
| BE2 | *E. coli* BL21 (DE3) *ΔlacZ ΔlacA ΔwcaJ ΔpfkA ΔpoxB ΔnudD ΔptsG* | this study |
| BE2-1 | *E. coli* BL21 (DE3*) ΔlacZ ΔlacA ΔwcaJ ΔpfkA ΔpoxB ΔnudD ΔptsG* pETDuet*-**glk-*BKHT*,* pRSFDuet*-GalTpm1141 and* pCDFDuet*-glf* | this study |
| BE2-2 | *E. coli* BL21 (DE3*) ΔlacZ ΔlacA ΔwcaJ ΔpfkA ΔpoxB ΔnudD ΔptsG* pETDuet*-*BKHT*,* pRSFDuet-*glk-GalTpm1141 and* pCDFDuet*-glf* | this study |
| BE2-3 | *E. coli* BL21 (DE3*) ΔlacZ ΔlacA ΔwcaJ ΔpfkA ΔpoxB ΔnudD ΔptsG* pETDuet*-*BKHT*,* pRSFDuet *-GalTpm1141 and* pCDFDuet*-glf*-*glk* | this study |
| BE2-4 | *E. coli* BL21 (DE3*) ΔlacZ ΔlacA ΔwcaJ ΔpfkA ΔpoxB ΔnudD ΔptsG* pETDuet*-glf-*BKHT*,* pRSFDuet *-GalTpm1141 and* pCDFDuet-*glk* | this study |
| BE3 | *E. coli* BL21 (DE3) *ΔlacZ ΔlacA ΔwcaJ ΔpfkA ΔpoxB ΔnudD* *ΔptsGΔagp* | this study |
| BE3-1 | BE3 harboring pETDuet -BKHT, pRSFDuet*-GalTpm1141*, and pCDFDuet*-glf-glk-Pgi* | this study |
| BE3-2 | BE3harboring pETDuet*-Pgi-*BKHT*,* pRSFDuet*-GalTpm1141, and* pCDFDuet*-glf-glk* | this study |
| BE3-3 | BE3 harboring pETDue*t-*BKHT*-Pgi,* pRSFDuet*-GalTpm1141, and* pCDFDuet*-glf-glk* | this study |
| BE3-4 | BE3 harboring pETDue*t-*BKHT*,* pRSFDuet*-Pgi-GalTpm1141, and* pCDFDuet*-glf-glk* | this study |
| BE3-5 | BE3 harboring pETDuet-BKHT*,* pRSFDuet*-GalTpm1141-Pgi, and* pCDFDuet*-glf-glk* | this study |
| BE3-6 | BE3 harboring pETDuet -BKHT*,* pRSFDuet*-GalTpm1141, and* pCDFDuet*-glf-Pgi-glk* | this study |
| BE4 | *E. coli* BL21 (DE3) Δ*lacZ* Δ*lacA* Δ*wcaJ* Δ*pfkA* Δ*poxB* Δ*nudD*  Δ*ptsG*Δ*agp ΔsetA* | this study |
| BE4-1 | BE4 harboring pRSFDue*t-GalTpm1141-pgm*,pETDuet*-Pgi*-BKHT, and pCDFDuet*-glf-glk* | this study |
| BE4-2 | BE4 harboring pRSFDue*t-**pgm-GalTpm1141*,pETDuet*-Pgi*-BKHT, and pCDFDuet*-glf-glk* | this study |
| BE4-3 | BE4 harboring pRSFDuet-GalTpm1141*-pgm-galU* pETDuet*-Pg*i-BKHT, and pCDFDuet*-glf-glk* | this study |
| BE4-4 | BE4 harboring pRSFDue*t-GalTpm1141-galE-galU* pETDuet*-Pgi-*BKHT, and pCDFDuet*-glf-glk* | this study |
| BE4-5 | BE4 harboring pRSFDue*t-GalTpm1141-pgm-galE-galU* pETDuet*-Pgi*-BKHT, and pCDFDuet*-glf-glk* | this study |
| BE4-6 | BE4 harboring pRSFDue*t-**pgm-galE-galU-GalTpm1141* pETDuet*-Pgi*-BKH*T*, and pCDFDuet*-glf-glk* | this study |
| BE4-7 | BE4 harboring pRSFDue*t-GalTpm1141-pgm-galE-ppa-galU* pETDuet*-Pgi*-BKHT, and pCDFDuet*-glf-glk* | this study |
| BE4-8 | BE4 harboring pRSFDue*t-GalTpm1141-pgm-galE-galU* pETDuet*-Pgi-*BKHT, and pCDFDuet*-glf-glk-ppa* | this study |
| BE4-9 | BE4 harboring pRSFDue*t--GalTpm1141-pgm-galE-galU*pETDuet*-ppa-Pgi-*BKHT, and pCDFDuet*-glf-glk* | this study |
| BE5 | *E. coli* BL21 (DE3) Δ*lacZ* Δ*lacA* Δ*wcaJ* Δ*pfkA* Δ*poxB* Δ*nudD*  Δ*ptsG*Δ*agp* *ΔsetAΔgcdΔudg* | this study |
| BE5-1 | BE5 harboring pCDFDuet*-glf-glk-ppa-gsk*,pRSFDuet-*GalTpm1141-pgm-galE-galU* and pETDuet-*Pgi-zwf* -BKHT | this study |
| BE5-2 | BE5 harboring pCDFDuet*-glf-glk-ppa-**gsk-zwf*,pRSFDuet-*GalTpm1141-pgm-galE-galU* and pETDuet-*Pgi*-BKHT | this study |
| BE5-3 | BE5 harboring pCDFDuet*-glf-glk-ppa*,pRSFDuet-*GalTpm1141-pgm-galE-galU* and pETDuet-*Pgi-**zwf-gsk*-BKHT | this study |
| BE5-4 | BE5 harboring pCDFDuet*-glf-glk-ppa-gsk*,pRSFDuet-*GalTpm1141-pgm-galE-galU-**zwf* and pETDuet-*Pgi*-BKHT | this study |
| BE5-5 | BE5 harboring pCDFDuet*-glf-glk -ppa-gsk*,pRSFDuet-*GalTpm1141-pgm-galE-galU* and pETDuet-*Pgi*-BKHT*-zwf* | this study |
| BE5-6 | BE5 harboring pCDFDuet*-glf-glk-ppa-zwf-gsk*,pRSFDuet-*GalTpm1141-pgm-galE-galU* and pETDuet-*Pgi*-BKHT | this study |
| BE5-7 | BE5 harboring pCDFDuet*-glf-glk-zwf-ppa-gsk*,pRSFDuet-*GalTpm1141-pgm-galE-galU* and pETDuet-*Pgi*-BKHT | this study |
| BE5-8 | BE5 harboring pCDFDuet*-glf-glk-ppa*,pRSFDuet-*GalTpm1141-pgm-galE-galU* and pETDuet-*Pgi*-BKHT*-zwf-gsk* | this study |
| BE5-9 | BE5 harboring pCDFDuet*-glf-glk-zwf-ppa*,pRSFDuet-*GalTpm1141-pgm-galE-galU* and pETDuet-*Pgi*-BKHT*-gsk* | this study |
| Plasmids |  |  |
| pRSFDuet-1 | two T7 promoters, RSF1030 replicon, KanR, high copy number(~100) | Novagen |
| pETDuet-1 | two T7 promoters, pBR322 replicon, AmpR, medium copynumber(~40) | Novagen |
| pCDFDuet-1 | two T7 promoters, CloDF13 replicon, SmR, medium copynumber, 20~40 copies/cell | Novagen |
| pETDuet-BKHT | pETDuet-1 vector harbors the enzyme BKHT. | this study |
| pRSFDuet-*glk-GalTpm1141* | pCDFDuet-1with gene *glf* | this study |
| pCDFDuet*-**glf*-*glk* | pCDFDuet-1with gene cluster *glf* +*glk* | this study |
| pCDFDuet*-glf-glk-Pgi* | pCDFDuet-1with gene cluster *glf* +*glk*+*Pgi* | this study |
| pETDuet*-Pgi-*BKHT | pETDuet-1with gene *Pgi* and enzyme BKHT | this study |
| pETDue*t-*BKHT*-Pgi* | pETDuet-1with gene *Pgi* and enzyme BKHT | this study |
| pRSFDuet*-Pgi-**GalTpm1141* | pRSFDuet-1with gene cluster *Pgi*+*GalTpm1141* | this study |
| pRSFDuet*-GalTpm1141-Pgi* | pRSFDuet-1with gene cluster *Pgi*+*GalTpm1141* | this study |
| pCDFDuet*-glf-**Pgi-glk* | pCDFDuet-1with gene cluster *glf+Pgi+glk* | this study |
| pRSFDue*t-pgm-**GalTpm1141* | pRSFDuet-1with gene cluster *pgm*+*GalTpm1141* | this study |
| pRSFDuet-GalTpm1141*-pgm-galU* | pRSFDuet-1with gene cluster *pgm*+*GalTpm1141*+*galU* | this study |
| pRSFDue*t-GalTpm1141-galE-galU* | pRSFDuet-1with gene cluster *GalTpm1141*+*galU*+*galE* | this study |
| pRSFDue*t-GalTpm1141-pgm-galE-galU* | pRSFDuet-1with gene cluster *pgm*+*GalTpm1141*+*galU*+*galE* | this study |
| pRSFDue*t-pgm-galE-galU-GalTpm1141* | pRSFDuet-1with gene cluster *pgm*+*GalTpm1141*+*galU*+*galE* | this study |
| pRSFDue*t-GalTpm1141-pgm-galE-ppa-galU* | pRSFDuet-1with gene cluster *pgm*+*GalTpm1141*+*galU*+*galE*+ppa | this study |
| pETDuet*-ppa-Pgi-*BKHT | pETDuet-1with gene *Pgi*+*ppi* and enzyme BKHT | this study |
| pCDFDuet*-glf-glk-ppa-gsk* | pCDFDuet-1with gene cluster *glf* +*glk*+*ppa+gsk* | this study |
| pETDuet-*Pgi-zwf* -BKHT | pETDuet-1with gene *Pgi*+*zwf* and enzyme BKHT | this study |
| pCDFDuet*-glf-glk-ppa-gsk-zwf* | pCDFDuet-1with gene cluster *glf* +*glk*+*ppa+gsk+zwf* | this study |
| pRSFDuet-*GalTpm1141-pgm-galE-galU-zwf* | pRSFDuet-1with gene cluster *pgm*+*GalTpm1141*+*galU*+*galE*+*zwf* | this study |
| pCDFDuet*-glf-glk -ppa-gsk* | pCDFDuet-1with gene cluster *glf* +*glk*+*ppa+gsk* | this study |
| pETDuet-*Pgi*-BKHT*-zwf* | pETDuet-1with gene *Pgi*+*zwf* and enzyme BKHT | this study |
| pCDFDuet*-glf-glk -ppa-gsk* | pCDFDuet-1with gene cluster *glf* +*glk*+*ppa**+gsk* | this study |
| pCDFDuet*-glf-glk-zwf-ppa-gsk* | pCDFDuet-1with gene cluster *glf* +*glk*+*ppa+gsk*+*zwf* | this study |
| pETDuet-*Pgi*-BKHT*-zwf-gsk* | pETDuet-1with gene *Pgi*+*zwf+gsk* and enzyme BKHT | this study |
| pCas | repA101(T s) kan Pcas-cas9 ParaB-Red lacIq Ptrc-sgRNA-pMB1,KanR | this study |
| pTargetF | sgRNA pMB1, ori, SpeR | this study |
| pTargetF-*ptsG* | pTarget derivate, contain sgRNA targeting to *ptsG* | this study |
| pTargetF-*agp* | pTarget derivate, contain sgRNA targeting to *agp* | this study |
| pTargetF-*setA* | pTarget derivate, contain sgRNA targeting to *agp* | this study |
| pTargetF-*gcd* | pTarget derivate, contain sgRNA targeting to *gcd* | this study |
| pTargetF-*udg* | pTarget derivate, contain sgRNA targeting to *udg* | this study |

**Table S2.** The Primers and gene sequences used for gene overexpression in this study are as follows

| Primers | Sequences (5’-3’) |
| --- | --- |
| 1-1 GalTpm1141-F | TTAACTTTAATAAGGAGATATACCCATATGCCGATGACCAACTATG |
| 1-1 GalTpm1141-R | GTTCGACTTAAGCATTATGCGGCCGCTTATTCAAATTTCACAATGCATTTCAG |
| 1-1 BKHT-F | GTGGTTCTGGTGGTGGTGGTTCTATGAAAAACAAAGTGCAGATTAAAATG |
| 1-1 BKHT-R | CAGCGGTGGCAGCAGCCTAGGTTACTGACCATAGCGAAAGGTGTTG |
| 2-1 glf-F | CTTTAATAAGGAGATATACCATGAGCAGCGAAAGCAGCCAAG |
| 2-1 glf-R | CTTTCTGTTCGACTTAAGCATTATTTCTGACTGCGCCACATTTCTTC |
| 2-1 glk-F | AGACTAAAAGGAGATATACCTTACAGAATGTGACCTAAGGTCTGGC |
| 2-1 glk-R | CTGCTCATGGTATATCTCCTTATGACAAAGTATGCATTAGTCGGTGATG |
| 3-2 pgi-F | GTTTAACTTTAAGAAGGAGATATACCATGAAAAACATCAATCCAACGC |
| 3-2 pgi-R | ATTTCATGGTATATCTCCTTTTAACCGCGCCACGCTTTATAG |
| 3-3 pgi-F | CTTTAAGAAGGAGATATACCATGAAAAACATCAATCCAACGC |
| 3-3 pgi-R | GCGGTGGCAGCAGCCTAGGTTATTAACCGCGCCACGCTTTATAG |
| 4-1 Galtpm1141-F | GTTTAACTTTAATAAGGAGATATACCATGCCGATGACCAACTATGTG |
| 4-1 Galtpm1141-R | CACGATTGTGGATTGCCATGGTATATCTCCTTTTATTCAAATTTCACAATGCATTTCAG |
| 4-5 pgM-F | AAGGAGATATACCATGGCAATCCACAATCGTGCAGGC |
| 4-5 pgM-R | GCCGAGCTCGAATTCGGATCCTTACGCGTTTTTCAGAACTTC |
| 4-5 galE-F | AGTATAAGAAGGAGATATACATATGAGAGTTCTGGTTACCGG |
| 4-5 galE-R | TAATGGCAGCCATGGTATATCTCCTTTTAATCGGGATATCCC |
| 4-5 galU-F | CGATATAAAGGAGATATACCATGGCTGCCATTAAT |
| 4-5 galU-R | CTCAGCGGTTGCAGCAGCCTAGGTTACTTCCTTAATGCCCATCTC |
| 4-8 ppa-F | AGTATAAGAAGGAGATATACATATGAGCTTACTCAACGTCCC |
| 4-8 ppa-R | GGTATATCTCCTTTTATTTATTCTTTGCGCGCTC |
| 5-7 zwf-F | TATAAGAAGGAGATATACATATGGCGGTAACGCAAACAGC |
| 5-7 zwf-R | GGTATATCTCCTTTTACTCAAACTCATTCCAGGAACGACCATC |
| 5-7 gsk-F | CGGTTAAAAGGAGATATACCATGAAATTTCCCGGTAAACGTAAATCC |
| 5-7 gsk-R | GGTATATCTCCTTTTAACGATCCCAGTAAGACTC |
| 5-7 ppa-F | AAGGAGATATACCATGAGCTTACTCAACGTCCCTG |
| 5-7 ppa-R | CCTTCGAGCGCGCAAAGAATAAATAAGGCCGCATAATGCTTAA |
| 4-7 ppa-F | CGATTAAAAGGAGATATACCATGAGCTTACTCAACGTCCCTG |
| 4-7 ppa-R | CAGCCATGGTATATCTCCTTTTATTTATTCTTTGCGCGCTCGAAG |
| 4-3 galU-F | AAGGAGATATACCATGGCTGCCATTAATACGAAAGTCAAAAAAG |
| 4-3 galU-R | CTCAGCGGTGGCAGCAGCCTAGGTTACTTCTTAATGCCCATCTC |
| 3-2 galU-F | GTATAAGAAGGAGATATACATATGTTGAAATAATGCTATGAGCG |
| 2-4 glf-F | ATCTTAGTATATTAGTTAAGATGAGCAGCGAAAGCAGCCAAG |
| 2-4 glf-R | TATATCTCCTTCTTATATTATTTCTGACTGCGCCACATTTCTTC |
| 3-2 pgi-F | GTATAAGAAGGAGATATACATATGAAAAACATCAATCCAACGCGAC |
| 3-2 pgi-R | GCAGCAGCCTAGGTTAATTAAACCGCGCCACGCTTTATAG |
| 3-4 pgi-F | TGTTTACTTTAAGAAGGAGATATACATGCCGATGACCAACTATG |
| 3-4 pgi-R | GCGGTGGCAGCAGCCTAGGTTATTAACCGCGCCACGCTTTATAG |
| 3-5 pgi-F | AAGGAGATATACCATGATGAAAAACATCAATCCAACGCAGACCGC |
| 3-5 pgi-R | GCTCGAATTCGGATCCTTAACCGCGCCACGCTTTATAG |
| 4-2 pgm-GalTpm1141-F | GAATTGTGAGCGGATAACAATTCCGCAATCCACAATCGTGCAGGC |
| 4-2 pgm-GalTpm1141-R | AGCGGTGGCAGCAGCCTAGGTTATTCAAATTTCACAATGCATTTCAG |
| 4-4 galE-galU-F | AAGGAGATATACCATGGCAATCCACAATCGTGCG |
| 4-4 galE-galU-R | CTCAGCGGTGGCAGCAGCCTAGGTTACTTCTTAATGCCCATCTC |
| 4-6 pgm-galE-galU-GalTpm1141-F | AAGGAGATATACCATGGCAATCCACAATCGTGCAGGCCAACCTGCAC |
| 4-6 pgm-galE-galU-GalTpm1141-R | AAGCGTGGCGCGGTTAACCTAGGCAAGGAGATATACAATGCCGATGACCAACTATG |
| 4-8 ppa-F | ATGAGCTTACTCAACGTCCCTGCGG |
| 4-8 ppa-R | GGTATATCTCCTTTTATTTATTCTTTGCGCGCTCGAAGG |
| 4-9 ppa-F | CCTCTAGAAATAATTTTGTTTAAATGAGCTTACTCAACGTCCCTGC |
| 4-9 ppa-R | GTATATCTCCTTCTTAAAGTTATTTATTCTTTGCGCGCTCGAAGGAGG |
| 5-1 glf-glk-ppa-F | CATCTTAGTATATTAGTTAAGATGAGCAGCGAAAGCAGCCAAG |
| 5-1 glf-glk-ppa-R | ATGTATATCTCCTTCTTATATTATTTATTCTTTGCGCGCTCGAAGG |
| 5-2 gsk-zwf-F | AAGGAGATATACCATGAAATTTCCCGGTAAACGTAAATCC |
| 5-2 gsk-zwf-R | CGTTACCGCCATTTAACGATCCCAGTAAGACTC |
| 5-6 zwf-gsk-F | AAGGAGATATACCATGGCGGTAACGCAAACAGCCCAGGC |
| 5-6 zwf-gsk-R | CTGTTCGACTTAAGCATTATGCGGCCTTAACGATCCCAGTAAGACTC |
| 5-4 zwf-F | TATAAGAAGGAGATATACATATGGCGGTAACGCAAACAGC |
| 5-4 zwf-R | GGTATATCTCCTTTTACTCAAACTCATTCCAGGAACGACCATC |
| 5-3 zwf-gsk-F | GGTTAAAAGGAGATATACCATGGCGGTAACGCAAACAGCCCAGGCC |
| 5-3 zwf-gsk-R | GGTATATCTCCTTTTAACGATCCCAGTAAGACTC |
| 5-8 zwf-gsk | ATGCTAGTTATLGCTCAGCGGTTATTCTGACTGCGCCACATTC |
| 5-8 zwf-gsk | TCGCCTGCTGAAAAACCGCTAACCTAGGCAAGGAGATATACATGAGCAGCGAAAGCAGC |
| 5-9 gsk | CGGTTAAAAGGAGATATACCATGAAATTTCCCGGTAAACGTAAATCC |
| 5-9 gsk | GGTATATCTCCTTTTAACGATCCCAGTAAGACTC |
| PtsG-N20-F | CAATCTGTATTCTTCTGGGGGTITTAGAGCTAGAAATAGCAAGTTAAATAAGG |
| Pt sG-N20-R | CCCCCAGAAGAATACAGATTGACTAGTATTATACCTAGGACTGAGCTAGCTG |
| Pt sG-UP-F | CGGTGCTTTTTTTTGAATTCTCTAGACCAGAATGATCCCTACGATG |
| Pt sG-UP-R | CGCCCAGTTTCTTCAGCCAGCTGAAATTCGC |
| Pt sG-DOWN-F | GCGAATTTCAGCTGGCTGAAGAAACTGGGCG |
| Pt sG-DOWN-R | GATGGAGCTGCACATGAACTCGAGTACGGTATTTATGAATTGTTTGG |
| agp-N20-F | AACTCGCTACTGATCCACAAGTTTTAGAGCTAGAAATAGCAAG |
| agp-N20-R | TTGTGGATCAGTAGCGAGTTACTAGCATTATCCTAGGACTGAGC |
| agp-UP-F | GCACCGAGTCGGTGCTTTTTTTGATAAACAAACGATCGAGGC |
| agp-UP-R | CCCGCTTCTCGCGGGGGAGTTTTCTGTCCTGGCACCTCTTTTGTTATCAATC |
| agp-DOWN-F | TGATTGATAACAAAAGAGGTGCCAGGACAGAAAACTCCCCCGCGAGAAG |
| agp-DOWN-R | CTGCAGGTCGACTCTAGAGAATTAAGTGGATGGCGCAGAAGTTGTC |
| setA-N20-F | GGTTGCCCGATAGATGCCAAGTTTTAGAGCTAGAAATAGCAAG |
| setA -N20-R | TTGGCATCTATCGGGCAACCACTAGCATTATCCTAGGACTGAGC |
| setA -UP-F | GCACCGAGTCGGTGCTTTTTTTGTCCTCATTTATGCGCGTTAGC |
| setA-UP-R | CTTTCCGCTATCGTCCACGTCAACGTTCCCTTTTTAGCGCGG |
| setA-DOWN-F | GCCGCGCTAAAAAGGGAACGTTGACGTGGACGATAGCGGAAAGC |
| setA-DOWN-R | CTGCAGGTCGACTCTAGAGAATTACGTTGTGCCTCCACCAGC |
| udg-N20-F | CGATAAATACCCACCACTTGGTTTTAGAGCTAGAAATAGCAAG |
| udg-N20-R | CAAGTGGTGGGTATTTATCGACTAGCATTATCCTAGGACTGAGC |
| udg-UP-F | GCACCGAGTCGGTGCTTTTTTTGTCGCATACTGCAACGCTTC |
| udg-UP-R | GTCAAACGGGCTTCTAATCGCACGTCTACACCCGCGATCTCTTTG |
| udg-DOWN-F | GCCAAAGAGATCGCGGGTGTAGACGTGCGATTAGAAGCCCGTTTG |
| udg-DOWN-R | CTGCAGGTCGACTCTAGAGAATTAACTGCGTGCGGCGTC |
| gcd-N20-F | GGAAGTTGGTTTCGACTTCTGTTTTAGAGCTAGAAATAGCAAG |
| gcd-N20-R | AGAAGTCGAAACCAACTTCCACTAGTATTATACCTAGGAC |
| gcd-UP-F | CCGAGTCGGTGCTTTTTTTGAATTCGGTGCTGATGGGCGAGCGTTTTG |
| gcd-UP-R | TTTTGCAGCGCTTTGCGGGCTGTATGTCACGGTTCATTTGGTACGAAG |
| gcd-DOWN-F | ATCTTCGTACCAAATGAACCGTGACATACAGCCCGCAAAGCGCTGC |
| gcd-DOWN-R | ACAGGGTAARAGATCTAAGCTTCAACGTTACCGTCACGGGATTTC |
